# Supplementary material for: Converting obsolete copy paper to porous carbon materials with preeminent adsorption performance for tetracycline antibiotic
Source: Royal Society of Chemistry journal article supplement (doi:10.1039/c5ra24707a), 2016-01-01
Supplement: c5ra24707a1.pdf [file c5ra24707a1.pdf]

## Supporting Information

### Converting Obsolete Copy Paper to Porous Carbon Materials with Preeminent Adsorption

#### Performance of Tetracycline Antibiotic

Atian Xie<sup>a</sup>, Jiangdong Dai<sup>a</sup>, Jinsong He<sup>a</sup>, Jun Sun<sup>a</sup>, Zhongshuai Chang<sup>a</sup>, Chunxiang Li<sup>a\*</sup> and  
Yongsheng Yan<sup>a,b\*</sup>

<sup>a</sup> School of Chemistry and Chemical Engineering, Jiangsu University, Zhenjiang 212013, China

<sup>b</sup> Key Laboratory of Preparation and Applications of Environmental Friendly Materials (Ministry of Education), Jilin Normal University, Siping 136000, China

Corresponding Author\*: Chunxiang Li

E-mail: [ujxat@163.com](mailto:ujxat@163.com)

Telephone Number: +86 0511-88790683; fax: +86 0511-88791800

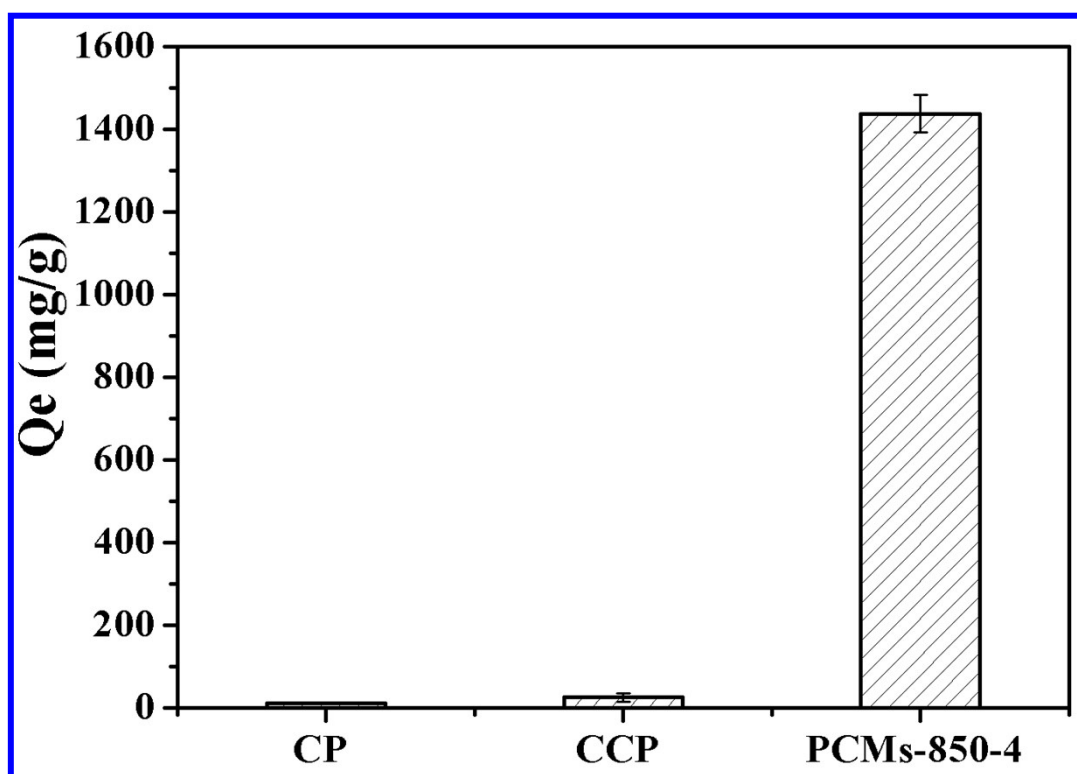

Fig. S1 Equilibrium absorption capacity of CP, CCP and PCMs-850-4 for TC.

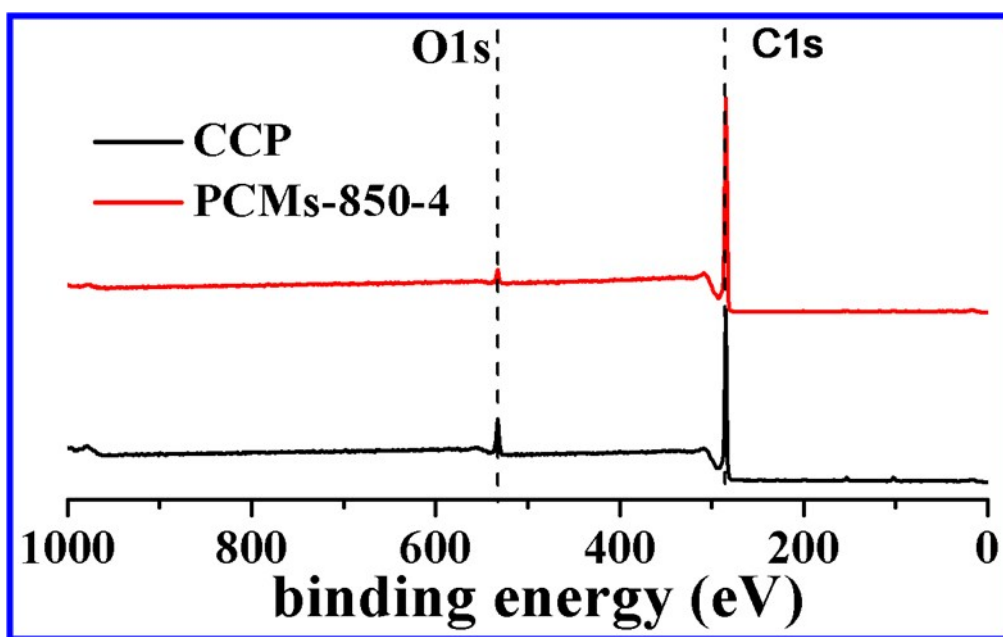

Fig. S2 The survey scans spectra of CCP and PCMs-850-4.

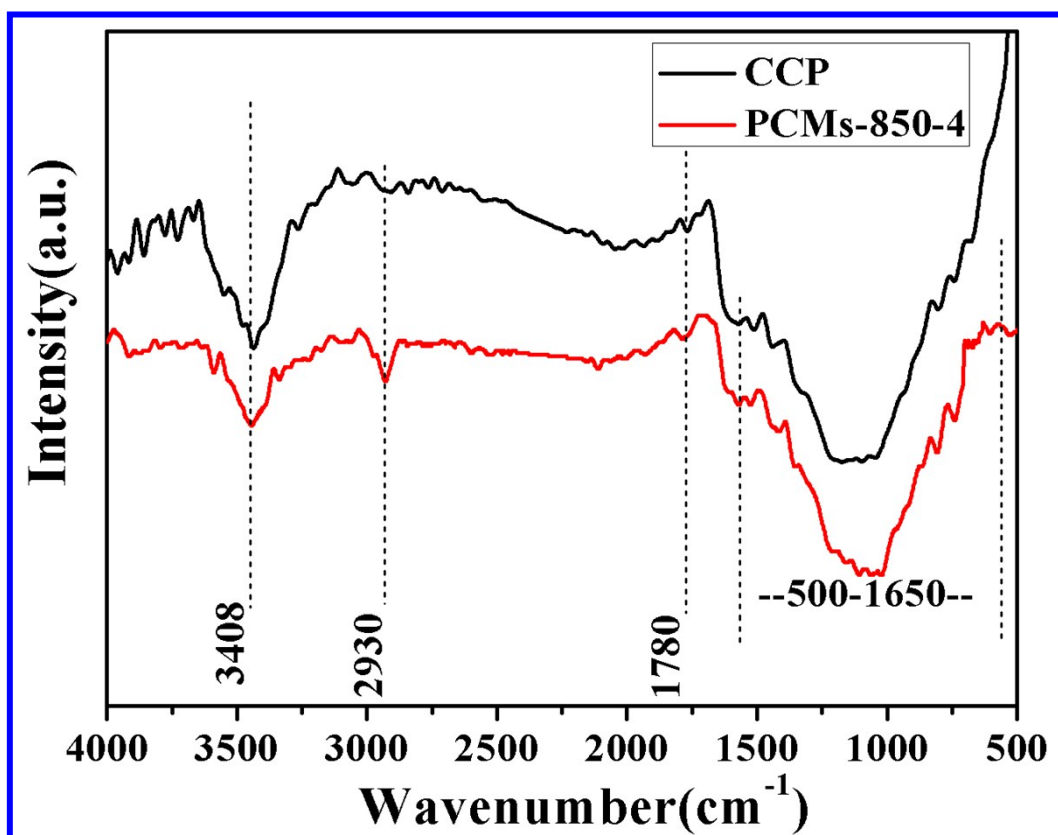

Fig. S3 FT-IR spectra of the CCP and PCMs-850-4.

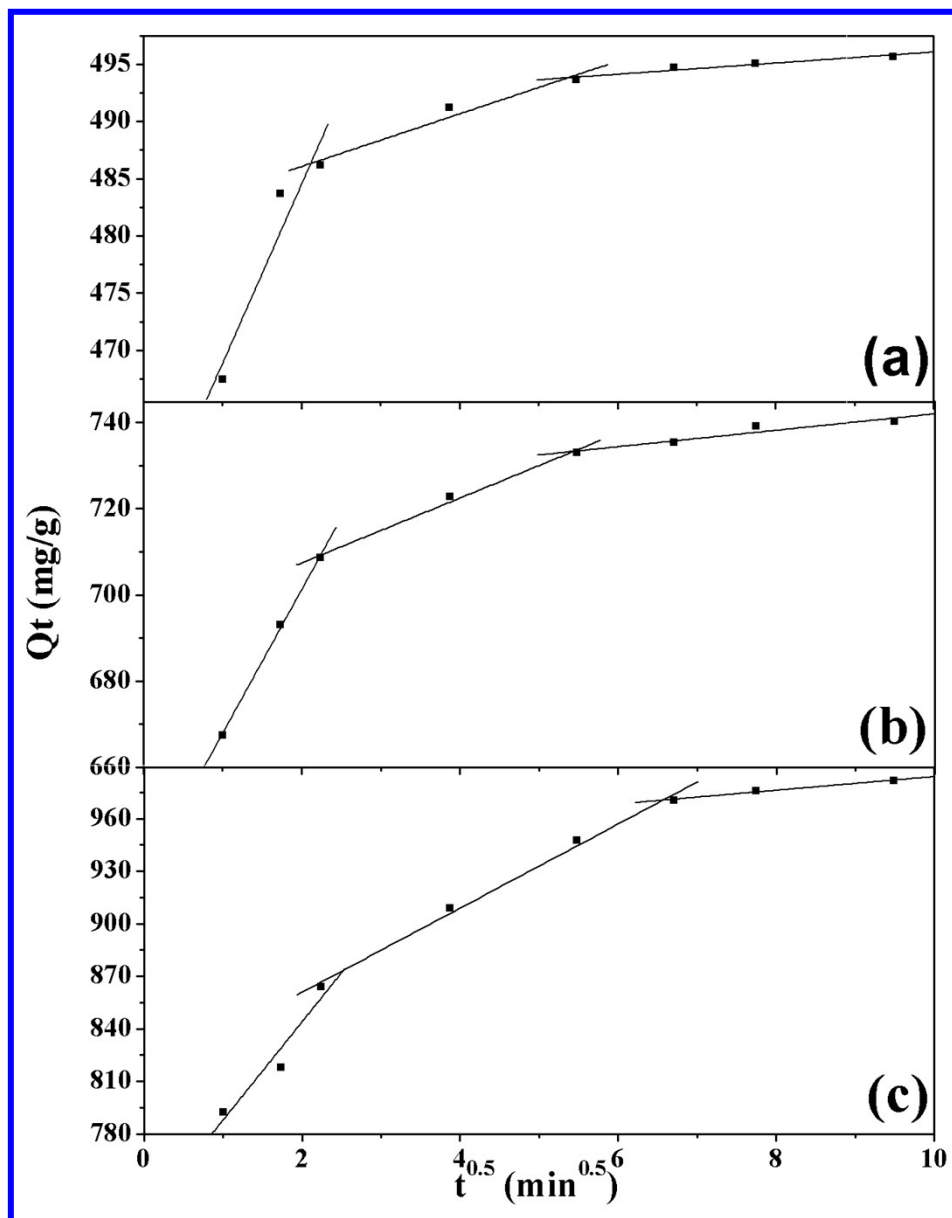

**Fig. S4** The intra-particle diffusion model of PCMs-850-4 (a) initial concentration=100mg/L (b) initial concentration=150mg/L (c) initial concentration=200mg/L.

**Table S1** Elemental analysis of CP, CCP and PCMs-850-4

| Elements   | C (%)    | H (%)    | O (%)    |
|------------|----------|----------|----------|
| CP         | 35.08717 | 60.06297 | 4.849865 |
| CCP        | 76.91172 | 19.39662 | 3.691662 |
| PCMs-850-4 | 89.29566 | 10.11361 | 0.590733 |

**Table S2** Functional group percentages of CCP and PCMs-850-4

| Content (%)    | O=C (531.3 eV) | H-O (532.4 eV) | C-O-C (533.7 eV) |
|----------------|----------------|----------------|------------------|
| CCP O1s        | 8.20           | 71.34          | 20.46            |
| PCMs-850-4 O1s | 10.20          | 59.49          | 30.31            |

**Table S3** Parameter of Intra-particle diffusion model

| Parameter                          | Intra-particle diffusion model |            |            |
|------------------------------------|--------------------------------|------------|------------|
|                                    | 100 (mg/L)                     | 150 (mg/L) | 200 (mg/L) |
| $C_1$ (mg/g)                       | 453.1                          | 634.3      | 731.8      |
| $K_1$ (mg/(g min <sup>0.5</sup> )) | 15.66                          | 33.39      | 56.11      |
| $R_1^2$                            | 0.915                          | 0.998      | 0.928      |
| $C_2$ (mg/g)                       | 481.4                          | 692.3      | 812.8      |
| $K_2$ (mg/(g min <sup>0.5</sup> )) | 2.302                          | 7.539      | 24.01      |
| $R_2^2$                            | 0.962                          | 0.992      | 0.994      |
| $C_3$ (mg/g)                       | 491.2                          | 722.9      | 944.8      |
| $K_3$ (mg/(g min <sup>0.5</sup> )) | 0.486                          | 1.91       | 3.91       |
| $R_3^2$                            | 0.929                          | 0.915      | 0.986      |
